# Supplementary material
Source: publisher figshare collection journal article supplement (https://asha.figshare.com/articles/dataset/_/28021070)
Supplement: Supplementary file 1 [file 2]

**Supplemental Material S2.** The full dataset for Experiment 2 including the thresholds and scores for each subject in the YNH, ONH, and OHL groups for all auditory perceptual and cognitive measures. Here we include the MTGD data used in the data analysis shown in the main document, which reflects the same and common MTGD task parameters completed by subjects.

| Subject | Group | ANL (dB) | NoNotch (dB) | Notch (dB) | FSI (dB) | STM (dB) | Diotic FM (Hz) | Dichotic FM (Hz) | Colocated SRM (TMR dB) | Separated SRM (TMR dB) | SRM (dB) | MTGD (ms) | UCMRT (#Hits) | CorsiFw (#Items) | CorsiBw (#Items) |
|---------|-------|----------|--------------|------------|----------|----------|----------------|------------------|------------------------|------------------------|----------|-----------|---------------|------------------|------------------|
| S1      | YNH   | 0.01     | 2            | -8.33      | 10.33    | 2.92     | 13.34          | 1.67             | 1.35                   | -2.77                  | 4.12     | 11.28     | 7             | 6                | 5                |
| S2      | YNH   | -1.99    | 2            | -13.66     | 15.66    | 1.47     | 3.75           | 0.56             | 3.42                   | -3.81                  | 7.23     | 25.36     | 17            | 7                | 7                |
| S3      | YNH   | -1.98    | -2.33        | -17        | 14.67    | 3.47     | 2.36           | 0.26             | 5.48                   | -7.94                  | 13.42    | 12.06     | 15            | 7                | 6                |
| S4      | YNH   | 5.01     | -3.33        | -12.66     | 9.33     | 2.80     | 3.54           | 0.94             | 3.42                   | 2.39                   | 1.03     | 14        | 18            | 8                | 7                |
| S5      | YNH   | 1.01     | -0.66        | -8.33      | 7.67     | 2.52     | 2.36           | 0.44             | 1.36                   | -6.9                   | 8.26     | 15.35     | 16            | 8                | 6                |
| S6      | YNH   | 1.02     | -2.33        | -7.66      | 5.33     | 2.12     | 1.76           | 0.33             | 3.42                   | -5.87                  | 9.29     |           | 8             | 7                | 5                |
| S7      | YNH   | 5.01     | -3.66        | -11        | 7.34     | 2.8      | 11.89          | 0.44             | 2.39                   | -7.93                  | 10.32    | 10.27     | 8             | 7                | 5                |
| S8      | YNH   | 0.01     | -1.33        | -21        | 19.67    | 2        | 2.97           | 0.28             | 3.42                   | -5.87                  | 9.29     |           | 16            | 8                | 7                |
| S9      | YNH   | 6.01     | -1.66        | -13.33     | 11.67    | 3.2      | 2.97           | 0.35             | 1.36                   | -3.81                  | 5.17     | 9.04      | 16            | 8                | 6                |
| S10     | YNH   | -0.99    | -6.33        | -15        | 8.67     | 2        | 2.97           | 0.29             | 0.33                   | -6.9                   | 7.23     |           | 13            | 7                | 8                |
| S11     | YNH   | -3.99    | 2            | -10        | 12       | 1.86     | 6.67           | 0.78             | 3.42                   | -7.93                  | 11.35    |           | 12            | 8                | 7                |
| S12     | YNH   | 0.01     | -1           | -9.33      | 8.33     | 2.66     | 5.61           | 0.47             | 3.42                   | -6.9                   | 10.32    |           | 11            | 5                | 4                |
| S13     | YNH   | 0.01     | -4           | -9         | 5        | 3.06     | 5              | 0.42             | 1.36                   | -4.84                  | 6.2      |           | 9             | 7                | 8                |
| S14     | YNH   | 1.01     | 2.67         | -7.33      | 10       | 3.72     | 9.44           | 0.44             | 3.42                   | -4.84                  | 8.26     |           | 11            | 6                | 6                |
| S15     | YNH   | 10.01    | 2            | -9         | 11       | 2.52     | 11.89          | 0.62             | 5.48                   | -5.87                  | 11.35    |           | 11            | 6                | 6                |
| S16     | YNH   | 2.01     | -6           | -5.66      | -0.34    | 3.86     | 4.45           | 0.94             | 5.49                   | -1.74                  | 7.23     |           | 14            | 7                | 6                |
| S17     | YNH   | 5.01     | -3           | -21.33     | 18.33    | 2.4      | 2.8            | 0.21             | 3.42                   | -5.87                  | 9.29     |           | 18            | 6                | 6                |
| S18     | YNH   | 3.01     | -2           | -17        | 15       | 3.2      | 3.15           |                  | 1.36                   | -2.77                  | 4.13     |           | 11            | 9                | 8                |
| S19     | YNH   | 5.01     | -0.33        | -11        | 10.67    | 2        | 3.34           | 0.59             | 4.45                   | -1.74                  | 6.19     |           | 19            | 7                | 6                |
| S20     | YNH   | 14.01    | 0.34         | -13.33     | 13.67    | 2.66     | 3.33           | 0.25             | 1.36                   | -3.81                  | 5.17     |           | 19            | 6                | 5                |
| S21     | ONH   | 1.01     | 2.67         | -10.33     | 13       | 5.72     | 11.22          | 0.52             | 5.48                   | 4.45                   | 1.03     | 15.43     | 7             | 6                | 6                |
| S22     | ONH   | -0.99    | 0.67         | -9         | 9.67     | 3.72     | 10.59          | 0.33             | 4.45                   | -2.77                  | 7.22     | 21.03     | 12            | 5                | 6                |
| S23     | ONH   |          | -0.33        | -7.66      | 7.33     | 0.78     | 5.95           | 0.37             | 3.42                   | -0.71                  | 4.13     | 9.88      | 6             | 5                | 5                |
| S24     | ONH   | 1.01     | -1           | -8.66      | 7.66     | 3.6      | 5              | 1.32             | 4.45                   | -1.74                  | 6.19     | 24.46     | 11            | 5                | 4                |
| S25     | ONH   | -2.99    | 1.34         | -12.33     | 13.67    | 4.12     | 8.91           | 1.57             | 3.42                   | -2.77                  | 6.19     | 13.29     | 6             | 4                | 5                |
| S26     | ONH   | -2.99    | 1            | -12.66     | 13.66    | 4.26     | 5.61           | 0.94             | 2.39                   | 3.42                   | -1.03    | 10.56     | 11            | 6                | 5                |
| S27     | ONH   | -7.99    | -3           | -13        | 10       | 3.06     | 10             | 0.44             | 3.42                   | -0.71                  | 4.13     | 9.29      | 8             | 6                | 7                |
| S28     | ONH   | -1.99    | 2.67         | -6         | 8.67     | 1.2      | 8.41           |                  | 3.42                   | 1.36                   | 2.06     | 16.66     | 8             | 7                | 5                |
| S29     | ONH   | 0.01     | 1.67         | -6.66      | 8.33     | 6.52     | 15.87          | 0.59             | 3.42                   | 5.48                   | -2.06    | 21.07     | 9             | 6                | 5                |

|     |     |       |       |        |       |       |       |      |      |       |       |       |    |   |   |
|-----|-----|-------|-------|--------|-------|-------|-------|------|------|-------|-------|-------|----|---|---|
| S30 | ONH | 2.01  | 2.67  | -10.33 | 13    | 5.6   | 6.29  | 0.49 | 4.45 | 1.36  | 3.09  | 34.1  | 10 | 6 | 6 |
| S31 | ONH | 7.01  | -1.33 | -12.33 | 11    | 3.866 | 3.53  | 0.42 | 4.45 | -1.74 | 6.19  | 18.79 | 11 | 6 | 7 |
| S32 | ONH | 2.01  | 0     | -7.66  | 7.66  | 2.8   | 4.72  | 0.42 | 3.42 | 1.55  | 1.87  |       | 12 | 6 | 6 |
| S33 | ONH | 14.01 | -1.33 | -11.33 | 10    | 2.66  | 14.98 | 0.19 | 2.39 | -4.84 | 7.23  | 23.39 | 8  | 8 | 7 |
| S34 | ONH | -3.99 | 2     | -7.33  | 9.33  | 3.06  | 1.32  | 0.37 | 3.42 | -4.84 | 8.26  | 9.98  | 12 | 5 | 4 |
| S35 | ONH | -1.99 | -0.33 | -13.66 | 13.33 | 2.66  | 3.74  | 0.49 | 4.45 | -0.71 | 5.16  |       | 10 | 5 | 6 |
| S36 | ONH | 9.01  | 0     | -6.66  | 6.66  | 3.06  | 5.29  | 0.42 | 5.48 | -2.77 | 8.25  |       | 13 | 7 | 7 |
| S37 | ONH | 15.01 | 2     | -14.66 | 16.66 | 2.92  | 8.9   | 0.42 | 3.42 | 2.39  | 1.03  |       | 7  | 5 | 6 |
| S38 | ONH | 9.01  | 1.67  | -9.66  | 11.33 | 3.2   | 9.44  | 0.74 | 5.48 | 5.48  | 0     | 46.16 | 7  | 5 | 5 |
| S39 | ONH | 6.01  | 0.67  | -13.33 | 14    | 3.46  | 11.89 | 0.52 | 2.39 | 2.39  | 0     | 37.86 | 9  | 6 | 6 |
| S40 | ONH | 6.01  | 3     | -14    | 17    | 2.92  | 3.15  | 0.59 | 4.45 | 2.39  | 2.06  |       | 10 | 7 | 6 |
| S41 | OHL | 4.01  | 6.00  | 3.00   | 3     | 7.20  | 7.07  | 3.97 | 6.52 | 4.45  | 2.07  | 18.82 | 7  | 6 | 4 |
| S42 | OHL | -4.98 | 0.34  | -6     | 6.34  | 4     | 10.50 | 0.78 | 2.39 | 0.33  | 2.06  | 15.75 | 6  | 6 | 4 |
| S43 | OHL | 10.01 | 0.67  | -1.00  | 1.67  | 4.12  | 9.44  | 0.44 | 3.42 | 3.42  | 0     | 8.28  | 6  | 5 | 5 |
| S44 | OHL | 8.01  | -0.33 | -9.33  | 9     | 3.20  | 6.67  | 2.81 | 2.39 | 5.48  | -3.09 | 14.32 | 10 | 5 | 4 |
| S45 | OHL | 2.01  | -2.66 | -14.00 | 11.34 | 4.00  | 5.00  | 3.15 | 3.42 | 3.42  | 0     | 15.68 | 9  | 6 | 6 |
| S46 | OHL | 7.01  | 0.00  | -6.00  | 6     | 4.26  | 5.00  | 2.97 | 5.48 | -1.74 | 7.22  | 22.76 | 6  | 5 | 5 |
| S47 | OHL | 4.01  | 3.00  | -6.33  | 9.33  | 5.72  | 15.87 | 1.77 | 3.42 | 1.36  | 2.06  | 12.59 | 13 | 6 | 5 |
| S48 | OHL | 10.01 | -3.66 | -8.00  | 4.34  | 1.06  | 7.94  | 0.37 | 5.48 | 0.33  | 5.15  | 20.62 | 4  | 6 | 5 |
| S49 | OHL | 4.01  | 0.34  | -9.33  | 9.67  | 3.46  | 7.07  | 2.10 | 4.45 | -2.77 | 7.22  | 8.03  | 11 | 7 | 7 |
| S50 | OHL | 14.01 | -0.66 | -10.66 | 10    | 2.92  | 10.59 | 0.28 | 3.42 | -0.71 | 4.13  | 12.29 | 9  | 7 | 7 |
| S51 | OHL | 3.02  | -1.33 | -9.33  | 8     | 2.66  | 1.65  | 1.57 | 4.45 | 2.39  | 2.06  | 12.74 | 4  | 5 | 5 |
| S52 | OHL | 16.02 | 4     | -2.33  | 6.33  | 5.06  | 8.84  | 1.77 | 4.45 | 3.42  | 1.03  |       | 3  | 6 | 4 |
| S53 | OHL | 2.02  | -3    | -10.5  | 7.5   | 3.46  | 5.95  | 1.67 | 1.36 | 9.61  | -8.25 | 15.68 | 6  | 6 | 5 |
| S54 | OHL | 6.12  | 2.00  | -6.33  | 8.33  | 4.80  | 4.45  | 0.39 | 4.45 | 2.39  | 2.06  | 15.21 | 5  | 5 | 6 |
| S55 | OHL | 7.02  | 3.67  | -5     | 8.67  | 3.06  | 11.14 | 0.74 | 2.39 | 3.42  | -1.03 | 13.54 | 11 | 5 | 5 |
| S56 | OHL | -0.98 | 0     | -2     | 2     | 6.4   | 9.92  | 10   | 2.39 | 6.52  | -4.13 | 13.54 | 6  | 5 | 6 |
| S57 | OHL | 2.02  | 2.34  | -5.33  | 7.67  | 4     | 8.34  | 0.52 | 5.48 | 4.45  | 1.03  | 11.63 | 8  | 6 | 5 |
| S58 | OHL | 8.02  | 0     | -7     | 7     | 2.52  | 8.34  | 0.52 | 3.42 | 7.55  | -4.13 | 14.82 | 4  | 5 | 6 |
| S59 | OHL | 19.02 | -1.6  | -5     | 3.4   | 3.06  | 5.89  | 0.56 | 3.42 | -1.74 | 5.16  | 16.74 | 11 | 7 | 7 |
| S60 | OHL | 2.02  | 2     | -6.4   | 8.4   | 3.46  | 6.25  | 0.44 | 4.45 | 3.42  | 1.03  | 15.28 | 7  | 6 | 5 |
