# Supplementary material
Source: publisher figshare collection journal article supplement (https://asha.figshare.com/articles/dataset/_/28021070)
Supplement: Supplementary file 2 [file 2]

**Supplemental Material S3.** Summary of mean thresholds, standard deviation, and *post-hoc* significance values for YNH, ONH, and OHL on the auditory perceptual, and cognitive tasks without excluding outliers. Significance values in bold indicate statistically significant differences between the groups as calculated by nonparametric Kruskal-Wallis test. Fw: Forward. Bw: Backward.

| Measures   |                    | YNH                          | ONH                          | OHL                         | YNH-ONH                   | YNH-OHL                   | ONH-OHL                |
|------------|--------------------|------------------------------|------------------------------|-----------------------------|---------------------------|---------------------------|------------------------|
| Perceptual | ANL (dB)           | 2.5 ± 4.3<br><i>n</i> = 20   | 4.01 ± 8.7<br><i>n</i> = 20  | 6.1 ± 5.8<br><i>n</i> = 20  | <i>p</i> = 1.0            | <i>p</i> = .07            | <i>p</i> = .15         |
|            | No-Notch (dB)      | -1.3 ± 2.6<br><i>n</i> = 20  | 0.7 ± 1.6<br><i>n</i> = 20   | 0.5 ± 2.5<br><i>n</i> = 20  | <b><i>p</i> = .028</b>    | <i>p</i> = .08            | <i>p</i> = 1.0         |
|            | Notch (dB)         | -12.1 ± 4.4<br><i>n</i> = 20 | -10.2 ± 2.7<br><i>n</i> = 20 | -6.3 ± 3.8<br><i>n</i> = 20 | <i>p</i> = 1.0            | <b><i>p</i> &lt; .001</b> | <b><i>p</i> = .006</b> |
|            | FSI (dB)           | 10.7 ± 4.7<br><i>n</i> = 20  | 11.1 ± 3.1<br><i>n</i> = 20  | 6.9 ± 2.7<br><i>n</i> = 20  | <i>p</i> = 1.0            | <b><i>p</i> = .005</b>    | <b><i>p</i> = .002</b> |
|            | STM (dB)           | 2.8 ± 0.6<br><i>n</i> = 20   | 3.5 ± 1.4<br><i>n</i> = 20   | 3.9 ± 1.4<br><i>n</i> = 20  | <b><i>p</i> = .04</b>     | <b><i>p</i> = .001</b>    | <i>p</i> = .82         |
|            | Diotic FM (Hz)     | 5.2 ± 3.6<br><i>n</i> = 20   | 7.7 ± 3.9<br><i>n</i> = 20   | 7.8 ± 3.1<br><i>n</i> = 20  | <b><i>p</i> = .04</b>     | <b><i>p</i> = .02</b>     | <i>p</i> = 1.0         |
|            | Dichotic FM (Hz)   | 0.6 ± 0.5<br><i>n</i> = 20   | 0.7 ± 0.7<br><i>n</i> = 20   | 1.8 ± 2.2<br><i>n</i> = 20  | <i>p</i> = 1.0            | <b><i>p</i> = .018</b>    | <i>p</i> = .08         |
|            | Colocated SRM (dB) | 2.9 ± 1.5<br><i>n</i> = 20   | 3.8 ± 0.9<br><i>n</i> = 20   | 3.8 ± 1.3<br><i>n</i> = 20  | <i>p</i> = .09            | <i>p</i> = .16            | <i>p</i> = 1.0         |
|            | Separated SRM (dB) | -4.8 ± 2.6<br><i>n</i> = 20  | 0.3 ± 3.2<br><i>n</i> = 20   | 2.7 ± 3.2<br><i>n</i> = 20  | <b><i>p</i> &lt; .001</b> | <b><i>p</i> &lt; .001</b> | <b><i>p</i> = .026</b> |
|            | SRM (dB)           | 7.7 ± 2.9<br><i>n</i> = 20   | 3.5 ± 3.2<br><i>n</i> = 20   | 1.1 ± 3.9<br><i>n</i> = 20  | <b><i>p</i> = .002</b>    | <b><i>p</i> &lt; .001</b> | <i>p</i> = .34         |
|            | MTGD (ms)          | 13.9 ± 5.5<br><i>n</i> = 7   | 20.8 ± 11.1<br><i>n</i> = 15 | 14.6 ± 3.6<br><i>n</i> = 19 | <i>p</i> = .25            | <i>p</i> = 1.0            | <i>p</i> = .81         |
| Cognitive  | UCMRT (#Hits)      | 13.4 ± 3.9<br><i>n</i> = 20  | 9.3 ± 2.2<br><i>n</i> = 20   | 7.3 ± 2.8<br><i>n</i> = 20  | <b><i>p</i> = .014</b>    | <b><i>p</i> &lt; .001</b> | <i>p</i> = .15         |
|            | Corsi Fw (#Items)  | 7.0 ± 0.9<br><i>n</i> = 20   | 5.8 ± 0.9<br><i>n</i> = 20   | 5.7 ± 0.7<br><i>n</i> = 20  | <b><i>p</i> = .001</b>    | <b><i>p</i> = .001</b>    | <i>p</i> = 1.0         |
|            | Corsi Bw (#Items)  | 6.2 ± 1.1<br><i>n</i> = 20   | 5.7 ± 0.9<br><i>n</i> = 20   | 5.3 ± 0.9<br><i>n</i> = 20  | <i>p</i> = .57            | <b><i>p</i> = .02</b>     | <i>p</i> = .57         |
