# Supplementary material
Source: publisher figshare collection journal article supplement (https://asha.figshare.com/articles/dataset/_/28021070)
Supplement: Supplementary file 3 [file 2]

**Supplemental Material S1.** The full dataset for Experiment 1 including individual thresholds for each subject on the auditory perceptual measures across both sessions and four conditions: Quiet, background noise (BN) through headphones, external noise (XN), and both background and external noise (BNXN).

| Subject | Condition | Session | STM (dB) | Diotic FM (Hz) | Dichotic FM (Hz) | Colocated SRM (TMR dB) | Separated SRM (TMR dB) | SRM (dB) | MTGD (ms) |
|---------|-----------|---------|----------|----------------|------------------|------------------------|------------------------|----------|-----------|
| ID1     | Quiet     | 1       | 1.07     | 3.75           | 0.22             | 1.36                   | -5.87                  | 7.23     | 7.15      |
| ID2     | Quiet     | 1       | 1.60     | 1.98           | 0.44             | 1.36                   | -4.84                  | 6.19     | 6.91      |
| ID3     | Quiet     | 1       | 2.67     | 7.07           | 0.29             | 4.45                   | -3.81                  | 8.26     | 5.42      |
| ID4     | Quiet     | 1       | 5.72     | 10.59          | 0.37             | 1.36                   | -1.74                  | 3.10     | 22.45     |
| ID5     | Quiet     | 1       | 2.08     | 3.15           | 0.50             | 3.42                   | -6.90                  | 10.32    | 6.60      |
| ID6     | Quiet     | 1       | 2.80     | 11.89          | 0.44             | 2.39                   | -7.94                  | 10.32    | 18.44     |
| ID7     | Quiet     | 1       | 1.20     | 3.34           | 7.49             | 5.48                   | 4.45                   | 1.03     | 9.66      |
| ID8     | Quiet     | 1       | 2.93     | 2.50           | 0.44             | 3.42                   | -3.81                  | 7.23     | 4.61      |
| ID9     | Quiet     | 1       | 2.93     | 9.44           | 0.15             | 1.36                   | -5.65                  | 7.00     | 9.33      |
| ID10    | Quiet     | 1       | 2.80     | 6.67           | 0.35             | 5.48                   | -0.71                  | 6.19     | 7.58      |
| ID1     | Quiet     | 2       | 2.53     | 2.36           | 0.19             | 4.45                   | -2.77                  | 7.23     | 8.81      |
| ID2     | Quiet     | 2       | 2.67     | 4.45           | 0.29             | 0.32                   | -3.81                  | 4.13     | 8.31      |
| ID3     | Quiet     | 2       | 2.93     | 3.15           | 0.39             | 2.39                   | -6.90                  | 9.29     | 7.41      |
| ID4     | Quiet     | 2       | 3.07     | 6.30           | 1.49             | 2.39                   | -5.87                  | 8.26     | 8.51      |
| ID5     | Quiet     | 2       | 2.80     | 4.72           | 0.42             | 3.42                   | -5.87                  | 9.29     | 7.41      |
| ID6     | Quiet     | 2       | 2.27     | 4.20           | 0.37             | 1.36                   | -8.00                  | 9.36     | 10.23     |
| ID7     | Quiet     | 2       | 1.60     | 2.23           | 0.22             | 3.42                   | -5.87                  | 9.29     | 7.76      |
| ID8     | Quiet     | 2       | 2.27     | 1.87           | 0.22             | 2.39                   | -7.94                  | 10.32    | 5.36      |
| ID9     | Quiet     | 2       | 2.24     | 5.61           | 0.10             | 2.39                   | -8.00                  | 10.39    | 8.03      |
| ID10    | Quiet     | 2       | 0.96     | 7.94           | 0.21             | 5.48                   | -7.94                  | 13.42    | 6.60      |
| ID1     | BN        | 1       | 2.00     | 5.00           | 0.11             | 1.36                   | -2.77                  | 4.13     | 6.60      |
| ID2     | BN        | 1       | 2.53     | 4.45           | 0.25             | 1.36                   | -3.81                  | 5.16     | 7.49      |
| ID3     | BN        | 1       | 2.13     | 3.54           | 0.37             | 5.48                   | -1.74                  | 7.23     | 7.24      |
| ID4     | BN        | 1       | 3.47     | 5.61           | 0.99             | 3.42                   | -7.94                  | 11.36    | 8.91      |
| ID5     | BN        | 1       | 1.73     | 7.49           | 0.33             | 2.39                   | -3.81                  | 6.19     | 7.07      |
| ID6     | BN        | 1       | 2.40     | 3.75           | 0.35             | 1.36                   | -3.81                  | 5.16     | 9.44      |
| ID7     | BN        | 1       | 3.47     | 2.97           | 0.32             | 5.48                   | -4.84                  | 10.32    | 7.32      |
| ID8     | BN        | 1       | 2.80     | 4.72           | 0.23             | 3.42                   | -7.94                  | 11.36    | 5.95      |
| ID9     | BN        | 1       | 2.40     | 5.00           | 0.25             | 2.39                   | -4.84                  | 7.23     | 7.49      |
| ID10    | BN        | 1       | 3.07     | 6.30           | 0.37             | 3.42                   | -4.84                  | 8.26     | 6.52      |
| ID1     | BN        | 2       | 2.27     | 1.77           | 0.11             | 4.45                   | -3.81                  | 8.26     | 6.91      |
| ID2     | BN        | 2       | 2.13     | 5.30           | 0.29             | 2.39                   | -2.77                  | 5.16     | 6.83      |
| ID3     | BN        | 2       | 2.67     | 5.95           | 0.28             | 1.36                   | -3.81                  | 5.16     | 9.01      |
| ID4     | BN        | 2       | 3.35     | 3.15           | 0.13             | 2.39                   | -8.00                  | 10.39    | 8.91      |
| ID5     | BN        | 2       | 2.93     | 3.34           | 0.10             | 3.42                   | -8.00                  | 11.42    | 7.15      |
| ID6     | BN        | 2       | 3.33     | 5.95           | 0.31             | 1.36                   | -7.94                  | 9.29     | 7.24      |
| ID7     | BN        | 2       | 2.27     | 2.23           | 0.29             | 3.42                   | -4.84                  | 8.26     | 5.36      |

|      |      |   |      |       |      |       |       |       |       |
|------|------|---|------|-------|------|-------|-------|-------|-------|
| ID8  | BN   | 2 | 2.27 | 2.65  | 0.39 | -0.71 | -7.94 | 7.23  | 5.24  |
| ID9  | BN   | 2 | 2.93 | 3.75  | 0.29 | 4.45  | -8.00 | 12.45 | 7.15  |
| ID10 | BN   | 2 | 2.00 | 6.67  | 5.95 | 4.45  | -2.77 | 7.23  | 6.23  |
| ID1  | XN   | 1 | 2.13 | 2.23  | 0.12 | 2.39  | -4.84 | 7.23  | 7.85  |
| ID2  | XN   | 1 | 1.33 | 4.72  | 0.21 | 4.45  | 0.32  | 4.13  | 8.03  |
| ID3  | XN   | 1 | 2.53 | 5.95  | 0.16 | 0.32  | -1.74 | 2.06  | 5.95  |
| ID4  | XN   | 1 | 3.73 | 13.35 | 0.59 | 5.48  | -4.84 | 10.32 | 10.97 |
| ID5  | XN   | 1 | 3.07 | 2.50  | 0.44 | 4.45  | -3.81 | 8.26  | 6.37  |
| ID6  | XN   | 1 | 2.80 | 7.49  | 0.29 | 1.36  | -7.94 | 9.29  | 7.32  |
| ID7  | XN   | 1 | 2.93 | 5.30  | 0.56 | 3.42  | -1.74 | 5.16  | 7.41  |
| ID8  | XN   | 1 | 2.13 | 5.61  | 0.20 | 0.32  | -3.81 | 4.13  | 6.16  |
| ID9  | XN   | 1 | 2.93 | 6.67  | 0.25 | 1.36  | -3.81 | 5.16  | 19.10 |
| ID10 | XN   | 1 | 3.60 | 15.87 | 0.50 | 5.48  | -0.71 | 6.19  | 13.82 |
| ID1  | XN   | 2 | 1.87 | 4.45  | 0.06 | 3.42  | -1.74 | 5.16  | 7.15  |
| ID2  | XN   | 2 | 3.04 | 2.65  | 0.17 | 4.45  | -4.84 | 9.29  | 7.24  |
| ID3  | XN   | 2 | 2.13 | 4.45  | 0.47 | 4.45  | -0.71 | 5.16  | 7.76  |
| ID4  | XN   | 2 | 3.07 | 10.00 | 0.59 | 3.42  | -7.94 | 11.36 | 9.77  |
| ID5  | XN   | 2 | 1.73 | 2.97  | 0.28 | 5.48  | -4.84 | 10.32 | 3.92  |
| ID6  | XN   | 2 | 2.53 | 3.97  | 0.33 | 1.36  | -6.90 | 8.26  | 6.83  |
| ID7  | XN   | 2 | 3.33 | 2.81  | 0.28 | 3.42  | -5.87 | 9.29  | 6.83  |
| ID8  | XN   | 2 | 2.53 | 2.81  | 0.29 | 2.39  | -3.81 | 6.19  | 5.61  |
| ID9  | XN   | 2 | 2.80 | 5.00  | 0.29 | 2.39  | -8.00 | 10.39 | 9.22  |
| ID10 | XN   | 2 | 3.07 | 6.30  | 0.28 | 5.48  | -2.77 | 8.26  | 8.91  |
| ID1  | BNXN | 1 | 2.27 | 3.75  | 0.16 | 2.39  | -3.81 | 6.19  | 4.40  |
| ID2  | BNXN | 1 | 2.13 | 2.65  | 0.37 | 4.45  | -3.81 | 8.26  | 6.91  |
| ID3  | BNXN | 1 | 2.67 | 5.61  | 0.17 | 5.48  | -0.71 | 6.19  | 8.91  |
| ID4  | BNXN | 1 | 8.67 | 1.67  | 2.10 | 2.39  | -2.77 | 5.16  | 13.66 |
| ID5  | BNXN | 1 | 2.93 | 7.07  | 0.50 | 1.36  | -1.74 | 3.10  | 9.55  |
| ID6  | BNXN | 1 | 2.13 | 6.30  | 0.26 | 2.39  | -3.81 | 6.19  | 7.32  |
| ID7  | BNXN | 1 | 4.27 | 3.75  | 8.91 | 2.39  | 4.45  | -2.06 | 14.47 |
| ID8  | BNXN | 1 | 2.40 | 2.50  | 0.29 | 0.32  | -3.81 | 4.13  | 5.12  |
| ID9  | BNXN | 1 | 2.27 | 8.41  | 0.26 | 1.36  | -6.90 | 8.26  | 10.47 |
| ID10 | BNXN | 1 | 1.20 | 8.91  | 0.28 | 4.45  | -3.81 | 8.26  | 7.07  |
| ID1  | BNXN | 2 | 2.27 | 2.50  | 0.09 | 1.36  | -4.84 | 6.19  | 6.91  |
| ID2  | BNXN | 2 | 0.80 | 5.00  | 0.13 | 3.42  | -2.77 | 6.19  | 6.99  |
| ID3  | BNXN | 2 | 3.47 | 7.49  | 0.19 | 4.45  | -2.77 | 7.23  | 6.83  |
| ID4  | BNXN | 2 | 2.80 | 7.49  | 0.35 | 2.39  | -2.77 | 5.16  | 8.41  |
| ID5  | BNXN | 2 | 1.60 | 3.54  | 0.25 | 2.39  | -4.84 | 7.23  | 7.41  |
| ID6  | BNXN | 2 | 2.80 | 2.65  | 0.33 | -1.74 | -6.90 | 5.16  | 6.52  |
| ID7  | BNXN | 2 | 2.53 | 2.36  | 0.44 | 1.36  | -6.90 | 8.26  | 4.83  |
| ID8  | BNXN | 2 | 0.64 | 4.20  | 0.26 | 0.32  | -6.90 | 7.23  | 6.23  |
| ID9  | BNXN | 2 | 2.53 | 7.49  | 0.29 | 2.39  | -5.87 | 8.26  | 8.22  |
| ID10 | BNXN | 2 | 2.53 | 1.18  | 0.33 | 5.48  | -7.94 | 13.42 | 6.52  |
